# Supplementary material for: Chinese herbal medicine Tangshen Formula treatment of patients with type 2 diabetic kidney disease with macroalbuminuria: study protocol for a randomized controlled trial
Source: PubMed Central journal article supplement (PMC4877744; doi:10.1186/s13063-016-1385-2), 2016-05-23

# 江阴天江药业有限公司 检验报告单

NO. 18894

|           |                               |                                                                                      |               |
|-----------|-------------------------------|--------------------------------------------------------------------------------------|---------------|
| 代号        | 0                             | 品名                                                                                   | 糖肾方颗粒(药) 配方颗粒 |
| 批号        | 1206388                       | 规格                                                                                   | 12克/袋         |
| 依据        | 江阴天江药业有限公司暂行质量标准              | 数量                                                                                   | 22320袋        |
| 取样日期      | 2012-7-23                     | 报告日期                                                                                 | 2012-10-24    |
| 检查项目      | 标 准                           | 结 果                                                                                  |               |
| [性 状]     | 本品为棕色颗粒, 气微, 味微苦。             |                                                                                      |               |
| [水 分]     | ≤6.0%                         |   |               |
| [溶化性]     | 溶化, 不得有焦屑, 允许有轻微浑浊            | 3.1%                                                                                 |               |
| [装量差异]    | 装量差异限度 ±5%                    | 符合规定                                                                                 |               |
| [微生物限度检查] |                               |                                                                                      |               |
| 细菌数:      | <1000cfu/g                    |  |               |
| 霉菌和酵母菌数:  | <100cfu/g                     | 10cfu/g                                                                              |               |
| 大肠埃希菌:    | 不得检出/g                        | <10cfu/g                                                                             |               |
| 结 论       | 本品按江阴天江药业有限公司暂行质量标准检验, 结果符合规定 |                                                                                      |               |

负责人

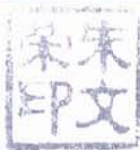

复核人

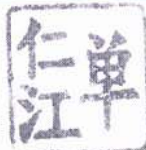

检验人

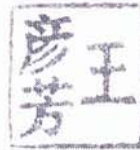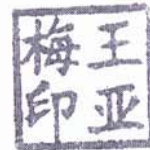

# 江阴天江药业有限公司检验报告单

NO. 18876

|           |                               |                                                                                      |               |
|-----------|-------------------------------|--------------------------------------------------------------------------------------|---------------|
| 代号        | 0                             | 品名                                                                                   | 糖肾方颗粒(安) 配方颗粒 |
| 批号        | 1206388.                      | 规格                                                                                   | 12克/袋         |
| 依据        | 江阴天江药业有限公司暂行质量标准              | 数量                                                                                   | 22920袋        |
| 取样日期      | 2012-7-21                     | 报告日期                                                                                 | 2012-10-24    |
| 检查项目      | 标 准                           | 结 果                                                                                  |               |
| [性 状]     | 本品为棕色颗粒, 气微, 味微苦。             |                                                                                      |               |
| [水 分]     | ≤6.0%                         |   | 3.1%          |
| [溶化性]     | 溶化, 不得有焦屑, 允许有轻微浑浊            |                                                                                      | 符合规定          |
| [装量差异]    | 装量差异限度                        | ±5%                                                                                  | 符合规定          |
| [微生物限度检查] |                               |                                                                                      |               |
| 细菌数:      | <1000cfu/g                    |  | 50cfu/g       |
| 霉菌和酵母菌数:  | <100cfu/g                     |                                                                                      | <10cfu/g      |
| 大肠埃希菌:    | 不得检出/g                        |                                                                                      | 未检出           |
| 结 论       | 本品按江阴天江药业有限公司暂行质量标准检验, 结果符合规定 |                                                                                      |               |

负责人

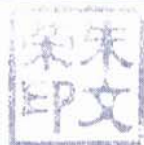

复核人

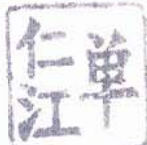

检验人

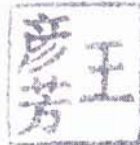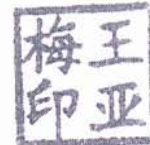

Supplement: 13063_2016_1385_MOESM3_ESM.pdf [file 13063_2016_1385_MOESM3_ESM.pdf]
